# Supplementary material for: Statistically rigorous and computationally efficient chromatin stripe detection with Quagga
Source: HighWire-hosted journal article supplement (doi:10.1101/gr.280132.124), 2025-11-12
Supplement: Supplemental_Table_S1.xlsx [file Supplemental_Table_S1.xlsx]

## Sheet: Sheet1
Supplementary Table 1:
Counted Stripes and Stripe assignments (if applicable).
Experiment	Sample	Tool	All Stripes	CTCF Stripe	EP/PP Stripe	Unassigned Stripe
AllTools	GM12878	Quagga	4133	3630	110	393
AllTools	GM12878	Zebra	3278	2523	242	513
AllTools	GM12878	Stripenn	873	738	22	113
DownSample	GM12878	4000M	4133	3630	110	393
DownSample	GM12878	1000M	2689	2267	46	270
DownSample	GM12878	250M	562	415	9	98
DownSample	GM12878	62.5M	59	33	0	15
DownSample	GM12878	15.625M	4	0	0	1
HiChIP	SMC1	Quagga	3782
HiChIP	CTCF	Quagga	2970
SPRITE	mESC	Quagga	1657
Differential-Resolution	5KB Res	Quagga	2925	2320	73	392
Differential- Resolution	10KB Res	Quagga	4133	3630	110	393
Tool Unique		Quagga	2702	2244	83	284
Tool Unique		Zebra	1824	723	170	440
Tool Unique		Stripenn	203	110	5	42
CTCF-degradation	HCT-116	No Treatment	3873
CTCF-degradation	HCT-116	Auxin	55
