# Supplementary material for: Statistically rigorous and computationally efficient chromatin stripe detection with Quagga
Source: HighWire-hosted journal article supplement (doi:10.1101/gr.280132.124), 2025-11-12
Supplement: Supplemental_Table_S2.xlsx [file Supplemental_Table_S2.xlsx]

## Sheet: Sheet1
Supplementary Table 2:
The source data for Quagga and the analysis of CTCF/Cohesion interacting and enhancer-promoter interacting chromatin stripes come from a combination of ENCODE, 4DN data portal, the JASPAR motif database, and the Gene Expression Omnibus.
Database	Accession	Datatype	Cell Line	Factor
4DN	4DNFI1UEG1HD	Hi-C	GM12878	N/A
4DN	4DNFIIMZB6Y9	Hi-C	H1-hESC	N/A
4DN	4DNFI2WSZPG9	Micro-C	H1-hESC	N/A
ENCODE	ENCSR000DZN	ChIP-seq	GM12878	CTCF
ENCODE	ENCSR000EAC	ChIP-seq	GM12878	RAD21
ENCODE	ENCSR000AKG	ChIP-seq	GM12878	H3K4me2
ENCODE	ENCSR057BWO	ChIP-seq	GM12878	H3K4me3
ENCODE	ENCSR000AKC	ChIP-seq	GM12878	H3K27ac
ENCODE	ENCSR000AMF	ChIP-seq	H1-hESC	CTCF
ENCODE	ENCSR000ECE	ChIP-seq	H1-hESC	RAD21
ENCODE	ENCSR000ECE	ChIP-seq	H1-hESC	H3K4me2
ENCODE	ENCSR000ANC	ChIP-seq	H1-hESC	H3K4me3
ENCODE	ENCSR019SQX	ChIP-seq	H1-hESC	H3K27ac
JASPAR	MA0139.1	binding motif	N/A (hg38)	CTCF
JASPAR	MA0139.2	binding motif	N/A (hg38)	CTCF
JASPAR	MA1929.1	binding motif	N/A (hg38)	CTCF
ENCODE	ENCFF796WRU	ChIP-seq	H1-hESC	CTCF-IDR
GEO	GSE241927	Region Capture Micro-C	GIST-T1	N/A
GEO	GSM7745703	ChIP-seq	GIST-T1	CTCF
GEO	GSM7745705	ChIP-seq	GIST-T1	RAD21
