# Supplementary material for: Statistically rigorous and computationally efficient chromatin stripe detection with Quagga
Source: HighWire-hosted journal article supplement (doi:10.1101/gr.280132.124), 2025-11-12
Supplement: Supplemental_Table_S3.xlsx [file Supplemental_Table_S3.xlsx]

## Sheet: Sheet1
Supplementary Table 3:
The source data for different cell comparison in Quagga and Quagga stripe calls on auxin-induced degradation of CTCF versus control, and for Hi-ChIP and SPRITE data.
Database	Accession	Datatype	Cell Line	Factor/Treated
4DN	4DNFIQHH2MMH	SPRITE	mESC	SPRITE
4DN	4DNFIYZIH4B8	Hi-ChIP	HG00731cells	CTCF
4DN	4DNFI837O1A3	Hi-ChIP	HG00731cells	SMC1
GEO	GSE104333	Hi-C	HCT-116	Auxin/NT
4DN	4DNFITUOMFUQ	Hi-C	K562	N/A
4DN	4DNFIFLJLIS5	Hi-C	HFFc6	N/A
4DN	4DNFIQYQWPF5	Hi-C	H1-hESC	N/A
